# Supplementary material
Source: ML conference proceedings conference paper supplement (https://proceedings.mlr.press/v89/liu19a.html)
Supplement: Supplementary file [file liu19a-supp.pdf]

---

## Structure of This Document

This supplementary document is the appendix section of the AISTATS'19 paper entitled "Distributed Inexact Newton-type Pursuit for Non-Convex Sparse Learning". It is organized as follows: In Section A we present several technical lemmas that will be used for proving the main results. In Section B we give the proofs of main results appeared in Section 3 of the paper. In Section C, we provide the proof of Theorem 3 in Section 4 of the paper.

## A Technical Lemmas

The following lemma shows that the estimation error of the truncated average of estimators is well upper bounded by the average error of those estimators.

**Lemma 2.** *Let  $\bar{w}$  be  $\bar{k}$ -sparse vector. For a set of  $k$ -sparse vectors  $\{w_j\}_{j=1}^m$  with  $k \geq \bar{k}$ , it holds that*

$$\left\| \mathbb{H}_k \left( \frac{1}{m} \sum_{j=1}^m w_j \right) - \bar{w} \right\| \leq \frac{1.62}{m} \sum_{j=1}^m \|w_j - \bar{w}\|.$$

Moreover, if  $k > \bar{k}$ , then

$$\left\| \mathbb{H}_k \left( \frac{1}{m} \sum_{j=1}^m w_j \right) - \bar{w} \right\| \leq \frac{1}{m} \sqrt{1 + 2\sqrt{\frac{\bar{k}}{k - \bar{k}}}} \sum_{j=1}^m \|w_j - \bar{w}\|.$$

*Proof.* The first claim follows readily from (Shen & Li, 2017, Theorem 1) and triangle inequality. The second claim is a direct consequence of the result in (Li et al., 2016, Lemma 3.3).  $\square$

The following lemma is key to our analysis.

**Lemma 3.** *Let  $\bar{w}$  be a  $\bar{k}$ -sparse target vector with  $\bar{k} \leq k$ . Assume that each component  $F_j(w)$  is  $\mu_{3k}$ -strongly-convex and  $\eta F(w) - F_j(w) - \frac{\gamma}{2}\|w\|^2$  has  $\alpha_{3k}$ -RLG. Then*

$$\|w^{(t)} - \bar{w}\| \leq \frac{3.24\alpha_{3k}}{\gamma + \mu_{3k}} \|w^{(t-1)} - \bar{w}\| + \frac{5.62\eta\sqrt{\bar{k}}}{\gamma + \mu_{3k}} \|\nabla F(\bar{w})\|_\infty + 2.3\sqrt{\frac{\epsilon}{\gamma + \mu_{3k}}}.$$

Moreover, assume that each  $F_j(w)$  has  $\beta_{3k}$ -RLH. Let  $\bar{H}_j = \nabla^2 F_j(\bar{w})$  and  $\bar{H} = \frac{1}{m} \sum_{j=1}^m \bar{H}_j$ . Then

$$\begin{aligned} \|w^{(t)} - \bar{w}\| &\leq \frac{3.24(\gamma + \max_j \|\bar{H}_j - \eta\bar{H}\|)}{\gamma + \mu_{3k}} \|w^{(t-1)} - \bar{w}\| + \frac{1.62(1 + \eta)\beta_{3k}}{\gamma + \mu_{3k}} \|w^{(t-1)} - \bar{w}\|^2 \\ &\quad + \frac{5.62\eta\sqrt{\bar{k}}}{\gamma + \mu_{3k}} \|\nabla F(\bar{w})\|_\infty + 2.3\sqrt{\frac{\epsilon}{\gamma + \mu_{3k}}}. \end{aligned}$$

*Proof.* For any  $j \in [m]$ , since  $F_j(w)$  is  $\mu_{3k}$ -strongly-convex, we have that  $P_j(w; w^{(t-1)} | \eta, \gamma)$  is  $(\gamma + \mu_{3k})$ -strongly-convex. Let  $S_j^{(t)} = \text{supp}(w_j^{(t)})$ ,  $S^{(t-1)} = \text{supp}(w^{(t-1)})$  and  $\bar{S} = \text{supp}(\bar{w})$ . Consider  $S = S_j^{(t)} \cup S^{(t-1)} \cup \bar{S}$ . Then

$$\begin{aligned} &P_j(w_j^{(t)}; w^{(t-1)} | \eta, \gamma) \\ &\geq P_j(\bar{w}; w^{(t-1)} | \eta, \gamma) + \langle \nabla P_j(\bar{w}; w^{(t-1)} | \eta, \gamma), w_j^{(t)} - \bar{w} \rangle + \frac{\gamma + \mu_{3k}}{2} \|w_j^{(t)} - \bar{w}\|^2 \\ &= P_j(\bar{w}; w^{(t-1)} | \eta, \gamma) + \langle \nabla_S P_j(\bar{w}; w^{(t-1)} | \eta, \gamma), w_j^{(t)} - \bar{w} \rangle + \frac{\gamma + \mu_{3k}}{2} \|w_j^{(t)} - \bar{w}\|^2 \\ &\geq \xi_1 P_j(w_j^{(t)}; w^{(t-1)} | \eta, \gamma) - \epsilon - \|\nabla_S P_j(\bar{w}; w^{(t-1)} | \eta, \gamma)\| \|w_j^{(t)} - \bar{w}\| + \frac{\gamma + \mu_{3k}}{2} \|w_j^{(t)} - \bar{w}\|^2, \end{aligned}$$

where “ $\zeta_1$ ” follows from the definition of  $w^{(t)}$  as an  $\epsilon$ -approximate  $k$ -sparse minimizer of  $P_j(w; w^{(t-1)} \mid \eta, \gamma)$ . By rearranging both sides of the above inequality with proper elementary calculation we get

$$\begin{aligned}
 & \|w_j^{(t)} - \bar{w}\| \\
 & \leq \frac{2}{\gamma + \mu_{3k}} \|\nabla_S P_j(\bar{w}; w^{(t-1)} \mid \eta, \gamma)\| + \sqrt{\frac{2\epsilon}{\gamma + \mu_{3k}}} \\
 & = \frac{2}{\gamma + \mu_{3k}} \|\eta \nabla_S F(w^{(t-1)}) - \nabla_S F_j(w^{(t-1)}) + \gamma(\bar{w} - w^{(t-1)}) + \nabla_S F_j(\bar{w})\| + \sqrt{\frac{2\epsilon}{\gamma + \mu_{3k}}} \\
 & = \frac{2}{\gamma + \mu_{3k}} \|\eta \nabla_S F(w^{(t-1)}) - \eta \nabla_S F(\bar{w}) - (\nabla_S F_j(w^{(t-1)}) - \nabla_S F_j(\bar{w})) + \gamma(\bar{w} - w^{(t-1)}) + \eta \nabla_S F(\bar{w})\| + \sqrt{\frac{2\epsilon}{\gamma + \mu_{3k}}} \\
 & \leq \frac{\zeta_1}{\gamma + \mu_{3k}} \left\| \left( \eta \nabla_S F(w^{(t-1)}) - \nabla_S F_j(w^{(t-1)}) - \gamma w^{(t-1)} \right) - \left( \eta \nabla_S F(\bar{w}) - \nabla_S F_j(\bar{w}) - \gamma \bar{w} \right) \right\| + \frac{2\eta}{\gamma + \mu_{3k}} \|\nabla_S F(\bar{w})\| \\
 & \quad + \sqrt{\frac{2\epsilon}{\gamma + \mu_{3k}}} \\
 & \leq \frac{2\alpha_{3k}}{\gamma + \mu_{3k}} \|w^{(t-1)} - \bar{w}\| + \frac{2\eta\sqrt{3k}}{\gamma + \mu_{3k}} \|\nabla F(\bar{w})\|_\infty + \sqrt{\frac{2\epsilon}{\gamma + \mu_{3k}}},
 \end{aligned}$$

where  $\zeta_1$  is according to the assumption that  $\eta F(w) - F_j(w) - \frac{\gamma}{2}\|w\|^2$  has  $\alpha_{3k}$ -RLG. Since  $w^{(t)} = \mathbf{H}_k \left( \frac{1}{m} \sum_{j=1}^m w_j^{(t)} \right)$ , by applying the first claim in Lemma 2 we obtain

$$\begin{aligned}
 \|w^{(t)} - \bar{w}\| & = 1.62 \left\| \frac{1}{m} \sum_{j=1}^m w_j^{(t)} - \bar{w} \right\| \\
 & \leq \frac{1.62}{m} \sum_{j=1}^m \|w_j^{(t)} - \bar{w}\| \leq \frac{3.24\alpha_{3k}}{\gamma + \mu_{3k}} \|w^{(t-1)} - \bar{w}\| + \frac{5.62\eta\sqrt{k}}{\gamma + \mu_{3k}} \|\nabla F(\bar{w})\|_\infty + 2.3\sqrt{\frac{\epsilon}{\gamma + \mu_{3k}}}.
 \end{aligned}$$

This shows the validity of the first part.

Next we prove the second part. Similar to the above argument we can derive the following:

$$\begin{aligned}
 & \|w_j^{(t)} - \bar{w}\| \\
 & \leq \frac{2}{\gamma + \mu_{3k}} \|\nabla_S P_j(\bar{w}; w^{(t-1)} \mid \eta, \gamma)\| + \sqrt{\frac{2\epsilon}{\gamma + \mu_{3k}}} \\
 & \leq \frac{2}{\gamma + \mu_{3k}} \left\| \gamma(w^{(t-1)} - \bar{w}) + \eta \nabla_S F(w^{(t-1)}) - \eta \nabla_S F(\bar{w}) - (\nabla_S F_j(w^{(t-1)}) - \nabla_S F_j(\bar{w})) \right\| \\
 & \quad + \frac{2\eta}{\gamma + \mu_{3k}} \|\nabla_S F(\bar{w})\| + \sqrt{\frac{2\epsilon}{\gamma + \mu_{3k}}} \\
 & \leq \frac{2}{\gamma + \mu_{3k}} \left\| \gamma(w^{(t-1)} - \bar{w}) + \eta \nabla_{SS}^2 F(\bar{w})(w^{(t-1)} - \bar{w}) - \nabla_{SS}^2 F_j(\bar{w})(w^{(t-1)} - \bar{w}) \right\| \\
 & \quad + \frac{2\eta}{\gamma + \mu_{3k}} \|\nabla_S F(\bar{w})\| + \frac{2\eta}{\gamma + \mu_{3k}} \left\| \nabla_S F(w^{(t-1)}) - \nabla_S F(\bar{w}) - \nabla_{SS}^2 F(\bar{w})(w^{(t-1)} - \bar{w}) \right\| \\
 & \quad + \frac{2}{\gamma + \mu_{3k}} \left\| \nabla_S F_j(w^{(t-1)}) - \nabla_S F_j(\bar{w}) - \nabla_{SS}^2 F_j(\bar{w})(w^{(t-1)} - \bar{w}) \right\| + \sqrt{\frac{2\epsilon}{\gamma + \mu_{3k}}} \\
 & \leq \frac{2}{\gamma + \mu_{3k}} (\gamma + \|\eta \nabla_{SS}^2 F(\bar{w}) - \nabla_{SS}^2 F_j(\bar{w})\|) \|w^{(t-1)} - \bar{w}\| + \frac{2\eta}{\gamma + \mu_{3k}} \|\nabla_S F(\bar{w})\| \\
 & \quad + \frac{(1 + \eta)\beta_{3k}}{\gamma + \mu_{3k}} \|w^{(t-1)} - \bar{w}\|^2 + \sqrt{\frac{2\epsilon}{\gamma + \mu_{3k}}} \\
 & \leq \frac{2(\gamma + \max_{j'} \|\bar{H}_{j'} - \eta \bar{H}\|)}{\gamma + \mu_{3k}} \|w^{(t-1)} - \bar{w}\| + \frac{(1 + \eta)\beta_{3k}}{\gamma + \mu_{3k}} \|w^{(t-1)} - \bar{w}\|^2 + \frac{2\eta\sqrt{3k}}{\gamma + \mu_{3k}} \|\nabla F(\bar{w})\|_\infty + \sqrt{\frac{2\epsilon}{\gamma + \mu_{3k}}}.
 \end{aligned}$$

Again, from the definition of  $w^{(t)}$  and by applying the first claim in Lemma 2 we have

$$\begin{aligned} & \left\| w^{(t)} - \bar{w} \right\| \\ & \leq \frac{3.24(\gamma + \max_j \|\bar{H}_j - \eta\bar{H}\|)}{\gamma + \mu_{3k}} \|w^{(t-1)} - \bar{w}\| + \frac{1.62(1 + \eta)\beta_{3k}}{\gamma + \mu_{3k}} \|w^{(t-1)} - \bar{w}\|^2 + \frac{5.62\eta\sqrt{k}}{\gamma + \mu_{3k}} \|\nabla F(\bar{w})\|_\infty \\ & \quad + 2.3\sqrt{\frac{\epsilon}{\gamma + \mu_{3k}}}. \end{aligned}$$

This proves desired bound in the second part.  $\square$

## B Proofs for the Main Results in Section 3

### B.1 Proof of Proposition 1

*Proof.* Consider an index set  $S$  with cardinality  $|S| \leq s$  and all  $w, w'$  with  $\text{supp}(w) \cup \text{supp}(w') \subseteq S$ . Since  $\sigma(z)$  is Lipschitz continuous with constant 1, we have that

$$|\sigma(2y_i w^\top x_i) - \sigma(2y_i w'^\top x_i)| \leq |2(w - w')^\top y_i x_i| \leq 2\|[x_i]_S\| \|w - w'\| \leq 2r_s \|w - w'\|.$$

Using this above inequality and the fact that  $\sigma(z) \leq 1$  we obtain

$$\begin{aligned} & |\sigma(2v_i w^\top u_i)(1 - \sigma(2v_i w^\top u_i)) - \sigma(2v_i w'^\top u_i)(1 - \sigma(2v_i w'^\top u_i))| \\ & \leq |\sigma(2v_i w^\top u_i) - \sigma(2v_i w'^\top u_i)|(1 + \sigma(2v_i w^\top u_i) + \sigma(2v_i w'^\top u_i)) \\ & \leq 3|\sigma(2v_i w^\top u_i) - \sigma(2v_i w'^\top u_i)| \leq 6r_s \|w - w'\|. \end{aligned}$$

This yields  $\|\Lambda(w) - \Lambda(w')\| \leq 24r_s \|w - w'\|$ . Therefore,

$$\|\nabla_{SS}^2 f(w) - \nabla_{SS}^2 f(w')\| \leq \frac{1}{n} \|X_S^n\|^2 \|\Lambda(w) - \Lambda(w')\| \stackrel{\zeta_1}{\leq} 24r_s \left\| \frac{1}{n} X_S^n (X_S^n)^\top \right\| \|w - w'\| \leq 24r_s \rho_s^{\max}(\Sigma_n) \|w - w'\|,$$

where the “ $\zeta_1$ ” follows from the standard matrix norm equality  $\|A\|^2 = \|AA^\top\|$ . This proves the desired result.  $\square$

### B.2 Proof of Theorem 1 and Corollary 1

*Proof of Theorem 1.* Since the local objective functions  $F_j$  are quadratic, we can simply set  $\beta_s = 0$  for all cardinality  $s$ . By assumption  $F_j(w)$  is  $\mu_{3k}$ -strongly-convex. Then by invoking the second part of Lemma 3 with  $\beta_{3k} = 0$ ,  $\gamma = 0$  and  $\epsilon \leq \frac{k\eta^2 \|\nabla F(\bar{w})\|_\infty^2}{5.29\mu_{3k}}$  we get

$$\|w^{(t)} - \bar{w}\| \leq \frac{3.24 \max_j \|\bar{H}_j - \eta\bar{H}\|}{\mu_{3k}} \|w^{(t-1)} - \bar{w}\| + \frac{6.62\eta\sqrt{k}}{\mu_{3k}} \|\nabla F(\bar{w})\|_\infty.$$

It can be readily verified that the factor  $\frac{3.24 \max_j \|\bar{H}_j - \eta\bar{H}\|}{\mu_{3k}} \leq \theta < 1$ . Based on the above recursion inequality we can show

$$\|w^{(t)} - \bar{w}\| \leq \theta^t \|w^{(0)} - \bar{w}\| + \frac{6.62\eta\sqrt{k} \|\nabla F(\bar{w})\|_\infty}{(1 - \theta)\mu_{3k}}.$$

Based on the inequality  $1 - x \leq \exp(-x)$  we need

$$t \geq \frac{1}{1 - \theta} \log \frac{(1 - \theta)\mu_{3k} \|w^{(0)} - \bar{w}\|}{\eta\sqrt{k} \|\nabla F(\bar{w})\|_\infty}$$

rounds of iteration/communication to achieve the precision of  $\|w^{(t)} - \bar{w}\| \leq \frac{7.62\eta\sqrt{k} \|\nabla F(\bar{w})\|_\infty}{(1 - \theta)\mu_{3k}}$ . This proves the desired complexity bound.  $\square$

Based on the results in Theorem 1 and Lemma 1 we can straightforwardly prove Corollary 1.

*Proof of Corollary 1.* From the definition of  $\theta$  and Lemma 1 we get  $\max_j \|H_j - H\| \leq \frac{\theta \mu_{3k}}{3.24}$  holds with probability at least  $1 - \delta$ . Since  $n > \frac{336L^2 \log(mp/\delta)}{\mu_{3k}^2}$ , we have  $\theta \in (0, 1)$ . The desired bound is then directly implied by Theorem 1.  $\square$

**Implications for distributed sparse linear regression.** Given a  $\bar{k}$ -sparse parameter vector  $\bar{w}$ , assume the samples are generated according to the linear model  $y = \bar{w}^\top x + \varepsilon$  where  $\varepsilon$  is a zero-mean Gaussian random noise variable with parameter  $\sigma$ . Assume the data samples  $\{D_j = \{x_{ji}, y_{ji}\}_{i=1}^n\}_{j=1}^m$  are distributed over  $m$  machines and let  $F_j(w) = \frac{1}{2n} \sum_{i=1}^n \|y_{ji} - w^\top x_{ji}\|^2$ ,  $j \in [m]$  be the least square loss over  $D_j$  and  $F(w) = \frac{1}{m} \sum_{j=1}^m F_j(w)$  be the average of local loss. This example belongs to the quadratic case for which the performance of DINPS is analyzed in Section 3.2. Suppose  $x_{ji}$  are drawn from Gaussian distribution with covariance  $\Sigma$ . Then it holds with high probability that  $F_j(w)$  has restricted strong-convexity constant  $\mu_{3k} \geq \lambda_{\min}(\Sigma) - \mathcal{O}(k \log p/n)$  and smoothness constant  $L \leq \max_{j,i} \|x_{ji}\|$ ; and  $\|\nabla F(\bar{w})\|_\infty = \mathcal{O}(\sigma \sqrt{\log p/(mn)})$  and  $\|\nabla F_j(\bar{w})\|_\infty = \mathcal{O}(\sigma \sqrt{\log p/n})$ . Consider the local initialization strategy of  $w^{(0)} \approx \arg \min_{\|w\|_0 \leq k} F_1(w)$ . Then according to the bound in (6), if the sample size  $n = \mathcal{O}\left(\frac{L^2 \log(mp)}{\mu_{3k}^2}\right)$  is sufficiently large, DINPS needs  $\mathcal{O}(\log m)$  rounds of iteration/communication to reach the statistical error level  $\mathcal{O}\left(\sigma \sqrt{k \log p/(mn)}\right)$ .

### B.3 Proof of Theorem 2 and Corollary 2

*Proof of Theorem 2.* We first claim that  $\|w^{(t)} - \bar{w}\| \leq \frac{\mu_{3k}\theta}{3.24(1+\eta)\beta_{3k}}$  holds for all  $t \geq 0$ . This can be shown by induction. Based on the theorem assumptions the claim holds for  $t = 0$ . Now suppose that  $\|w^{(t-1)} - \bar{w}\| \leq \frac{\mu_{3k}\theta}{3.24(1+\eta)\beta_{3k}}$  for some  $t \geq 1$ . Since  $\gamma = 0$ , according to Lemma 3 we have

$$\begin{aligned} & \|w^{(t)} - \bar{w}\| \\ & \leq \frac{3.24 \max_j \|\bar{H}_j - \eta \bar{H}\|}{\mu_{3k}} \|w^{(t-1)} - \bar{w}\| + \frac{1.62(1+\eta)\beta_{3k}}{\mu_{3k}} \|w^{(t-1)} - \bar{w}\|^2 + \frac{5.62\eta\sqrt{k}}{\mu_{3k}} \|\nabla F(\bar{w})\|_\infty + 2.3\sqrt{\frac{\epsilon}{\mu_{3k}}} \\ & \stackrel{\zeta_1}{\leq} \frac{\theta}{2} \|w^{(t-1)} - \bar{w}\| + \frac{1.62(1+\eta)\beta_{3k}}{\mu_{3k}} \|w^{(t-1)} - \bar{w}\|^2 + \frac{6.62\eta\sqrt{k}}{\mu_{3k}} \|\nabla F(\bar{w})\|_\infty \\ & \leq \theta \|w^{(t-1)} - \bar{w}\| + \frac{6.62\eta\sqrt{k}}{\mu_{3k}} \|\nabla F(\bar{w})\|_\infty \\ & \stackrel{\zeta_2}{\leq} \frac{\mu_{3k}\theta^2}{3.24(1+\eta)\beta_{3k}} + \frac{\mu_{3k}\theta(1-\theta)}{3.24(1+\eta)\beta_{3k}} = \frac{\mu_{3k}\theta}{3.24(1+\eta)\beta_{3k}}, \end{aligned}$$

where “ $\zeta_1$ ” follows from the assumptions on  $\max_j \|\bar{H}_j - \eta \bar{H}\|$  and  $\epsilon$ , and “ $\zeta_2$ ” follows from the condition of  $\|\nabla F(\bar{w})\|_\infty \leq \frac{(1-\theta)\theta\mu_{3k}^2}{21.45\eta(1+\eta)\beta_{3k}\sqrt{k}}$ . Thus by induction  $\|w^{(t)} - \bar{w}\| \leq \frac{\mu_{3k}\theta}{3.24(1+\eta)\beta_{3k}}$  holds for all  $t \geq 1$ . Then it follows from the inequality below “ $\zeta_1$ ” we get that for all  $t \geq 0$ ,

$$\|w^{(t)} - \bar{w}\| \leq \theta \|w^{(t-1)} - \bar{w}\| + \frac{6.62\eta\sqrt{k}}{\mu_{3k}} \|\nabla F(\bar{w})\|_\infty.$$

By recursively applying the above inequality we get

$$\|w^{(t)} - \bar{w}\| \leq \theta^t \|w^{(0)} - \bar{w}\| + \frac{6.62\eta\sqrt{k}}{(1-\theta)\mu_{3k}} \|\nabla F(\bar{w})\|_\infty.$$

Based on the inequality  $1 - x \leq \exp(-x)$  we need

$$t \geq \frac{1}{1-\theta} \log \left( \frac{(1-\theta)\mu_{3k} \|w^{(0)} - \bar{w}\|}{\eta\sqrt{k} \|\nabla F(\bar{w})\|_\infty} \right)$$

rounds of iteration/communication to achieve  $\|w^{(t)} - \bar{w}\| \leq \frac{7.62\eta\sqrt{k} \|\nabla F(\bar{w})\|_\infty}{(1-\theta)\mu_{3k}}$ . This proves the desired complexity bound.  $\square$

Corollary 2 can be readily proved by applying Lemma 1 to Theorem 2.

*Proof of Corollary 2.* From the definition of  $\theta$  and Lemma 1 we get that  $\max_j \|H_j - H\| \leq \frac{\theta \mu_{3k}}{6.48}$  holds with probability at least  $1 - \delta$ . Since  $n > \frac{1344L^2 \log(mp/\delta)}{\mu_{3k}^2}$ , we have  $\theta \in (0, 1)$ . By invoking Theorem 2 we get the desired result.  $\square$

### C Proof of Theorem 3 in Section 4

*Proof.* Recall that we update  $w^{(t)} = w_1^{(t)}$  in this non-convex setting. Then the assumption  $\|\nabla P_1(w_1^{(t)}; w^{(t-1)} | \eta, \gamma)\| \leq \epsilon$  implies

$$\|\nabla F_1(w^{(t)}) + \eta \nabla F(w^{(t-1)}) - \nabla F_1(w^{(t-1)}) + \gamma(w^{(t)} - w^{(t-1)})\| \leq \epsilon. \quad (\text{C.1})$$

Since  $F(w)$  is  $L_{2k}$ -smooth,

$$\begin{aligned} & F(w^{(t)}) \\ & \leq F(w^{(t-1)}) + \langle \nabla F(w^{(t-1)}), w^{(t)} - w^{(t-1)} \rangle + \frac{L_{2k}}{2} \|w^{(t)} - w^{(t-1)}\|^2 \\ & = F(w^{(t-1)}) - \frac{1}{\eta} \langle \nabla F_1(w^{(t)}) - \nabla F_1(w^{(t-1)}) + \gamma(w^{(t)} - w^{(t-1)}), w^{(t)} - w^{(t-1)} \rangle + \frac{L_{2k}}{2} \|w^{(t)} - w^{(t-1)}\|^2 \\ & \quad + \frac{1}{\eta} \langle \nabla F_1(w^{(t)}) + \eta \nabla F(w^{(t-1)}) - \nabla F_1(w^{(t-1)}) + \gamma(w^{(t)} - w^{(t-1)}), w^{(t)} - w^{(t-1)} \rangle \\ & \leq F(w^{(t-1)}) - \frac{2\gamma - (\eta + 1)L_{2k}}{2\eta} \|w^{(t)} - w^{(t-1)}\|^2 + \frac{\epsilon}{\eta} \|w^{(t)} - w^{(t-1)}\|. \end{aligned}$$

By rearranging the terms on both sides of the above we get

$$\frac{2\gamma - (\eta + 1)L_{2k}}{2\eta} \|w^{(t)} - w^{(t-1)}\|^2 - \frac{\epsilon}{\eta} \|w^{(t)} - w^{(t-1)}\| \leq F(w^{(t-1)}) - F(w^{(t)}).$$

By adding both sides of the above from index 1 to  $t$  we obtain

$$\begin{aligned} & \min_{\tau=1, \dots, t} \frac{2\gamma - (\eta + 1)L_{2k}}{2\eta} \|w^{(\tau)} - w^{(\tau-1)}\|^2 - \frac{\epsilon}{\eta} \|w^{(\tau)} - w^{(\tau-1)}\| \\ & \leq \frac{1}{t} \sum_{\tau=1}^t \frac{2\gamma - (\eta + 1)L_{2k}}{2\eta} \|w^{(\tau)} - w^{(\tau-1)}\|^2 - \frac{\epsilon}{\eta} \|w^{(\tau)} - w^{(\tau-1)}\| \\ & \leq \frac{1}{t} (F(w^{(0)}) - F(w^{(t)})) \leq \frac{1}{t} (F(w^{(0)}) - F(w^*)). \end{aligned}$$

From the above and the basic fact that  $ax^2 - bx - c < 0$  implies  $x^2 \leq \frac{2b^2}{a^2} + \frac{2c}{a}$  for  $a, b, c > 0$ , we can verify

$$\min_{\tau=1, \dots, t} \|w^{(\tau)} - w^{(\tau-1)}\|^2 \leq \frac{8\epsilon^2}{(\gamma - (\eta + 1)L_{2k})^2} + \frac{4\eta(F(w^{(0)}) - F(w^*))}{(\gamma - (\eta + 1)L_{2k})t}.$$

From (C.1) and triangle inequality we can derive that

$$\begin{aligned} \|\nabla F(w^{(t-1)})\|^2 & \leq \left( \frac{1}{\eta} \|\nabla F_1(w^{(t)}) - \nabla F_1(w^{(t-1)}) + \gamma(w^{(t)} - w^{(t-1)})\| + \epsilon \right)^2 \\ & \leq \frac{2(L_{2k} + \gamma)^2}{\eta^2} \|w^{(t)} - w^{(t-1)}\|^2 + 2\epsilon^2. \end{aligned}$$

By combining the preceding two inequalities we get

$$\min_{\tau=1, \dots, t} \|\nabla F(w^{(\tau)})\|^2 \leq \left( \frac{16(L_{2k} + \gamma)^2}{\eta^2(\gamma - (\eta + 1)L_{2k})^2} + 2 \right) \epsilon^2 + \left( \frac{8(L_{2k} + \gamma)^2(F(w^{(0)}) - F(w^*))}{\eta(\gamma - (\eta + 1)L_{2k})} \right) \frac{1}{t}.$$

The desired bound then follows from the setting of  $\gamma = (\eta + 2)L_{2k}$ . This completes the proof.  $\square$
